# Supplementary material for: Molar-scale formate production via enzymatic hydration of industrial off-gases
Source: Research Square preprint supplement (doi:10.21203/rs.3.rs-3137085/v1), 2023-09-15
Supplement: Supplementary file 1 [file 1d06e29f75962798fece7460.docx]

**Supplementary Information**

**Molar-scale formate production via enzymatic hydration of industrial off-gases**

Jinhee Lee1†, Suk Min Kim1†*, Byoung Wook Jeon1, Ho Won Hwang1, Eleni G. Poloniataki1, Sanghyung Lee2, Ho Won Ra3, Jeong-Geol Na4, Jinwon Lee4 and Yong Hwan Kim1,5*

1School of Energy and Chemical Engineering, Ulsan National Institute of Science and Technology (UNIST), 50 UNIST-gil, Ulsan 44919, Republic of Korea

2Environment and Energy Research Team, Research and Development Center, Hyundai Steel, 1480 Bukbusaneop-ro, Dangjin 31719, Republic of Korea

3Climate Change Research Division, Korea Institute of Energy Research (KIER), 152 Gajeong-ro, Daejeon 34129, Republic of Korea

4Department of Chemical and Biomolecular Engineering, 35 Baekbeom-ro, Sogang University, Seoul 04107, Republic of Korea

5Graduate School of Carbon Neutrality, Ulsan National Institute of Science and Technology (UNIST), 50 UNIST-gil, Ulsan 44919, Republic of Korea

†These authors contributed equally.

*Corresponding authors:

Suk Min Kim, e-mail: smkimlife@unist.ac.kr

Yong Hwan Kim, e-mail: metalkim@unist.ac.kr

**Supplementary Tables S1‒S8 and Figures S1‒S14**

**Supplementary Table 1 | Enzymes utilizing CO and CO2.**

| **Group** | **Name (EC number)** | **Classification** | **Origin** | **PDB code** | **Mediator use** | **Reference** |
| --- | --- | --- | --- | --- | --- | --- |
| ***Carbon monoxide dehydrogenase (CODH)*** | Ni‒Fe CODH (1.2.7.4) | Homodimeric CODH | *Carboxydothermus hydrogenoformans* | Oxygen-sensitive type: 1SU6, 1SU7, 1SU8, 1SUF, 3B51, 3B52, 3B53, 3I39, 5FLE, 2YIV, 4UDX, 4UDY Less oxygen-sensitive type: 6ELQ, 7ERR, 7XDM, 7XDN, 7XDP | BV, EV | This study |
| *Desulfovibrio vulgaris* | 6B6V, 6B6W, 6B6X, 6B6Y, 6DC2, 6ONC, 6OND, 6ONS, 6VWY, 6VWZ, 6VX0, 6VX1 | MV | Source58 |
| *Rhodospirillum rubrum* | 1JQK | BV, MV | Source59 |
| *Thermococcus onnurineus* NA1 | ‒ | BV, EV | This study |
| *Thermococcus* sp. AM4 | 6T7J | MV | Source34 |
| Heteromeric ACS/CODH complex | *Clostridium autoethanogenum* | 6YTT, 6YU9, 6YUA | MV | Source60 |
| *Methanosarcina barkeri* | 3CF4 | MV | Source61 |
| *Moorella thermoacetica* | 3I01, 3I04, 1MJG, 1OAO, 6X5K, 2Z8Y | MV | Source62 |
| ***Formate dehydrogenase (FDH)*** | Non-metal FDH (1.17.1.9) | Non-metal containing | *Arabidopsis thaliana* | 3JTM, 3N7U, 3NAQ | NAD+ | Source63 |
| *Candida boidinii* | 2FSS, 2J6I, 5DN9, 5DNA, 6D4B, 6D4C | NAD+ | Source64 |
| *Chaetomium thermophilum* | 6T8Y, 6T8Z, 6T92, 6T94 | NAD+ | Source65 |
| *Granulicella mallensis* | 4XYB, 4XYG, 6T8C, 6T8J, 6T9W, 6T9X, 6TB6 | NADP+ | Source66 |
| *Moraxella sp.C-1* | 2GSD, 3FN4 | NAD+ | Source67 |
| *Physcomitrium patens* | 7ARZ |  |  |
| *Pseudomonas sp. 101* | 2GO1, 2GUG, 2NAC, 2NAD, 6JUJ, 6JUK, 6JWG, 6JX1 | NAD+, NAD | Source68 |
| *Thiobacillus sp. KNK65MA* | 3WR5 | NAD+ | This study |
| Mo FDH (1.17.1.9) | Mo (molybdenum) containing | *Cupriavidus necator* | 6VW7, 6VW8 | BV, EV, NAD+ | Source69  Source70 |
| *Escherichia coli* | 1AA6, 1FDI, 1FDO, 1KQF, 1KQG, 2IV2 | BV | Source71 |
| *Methanospirillum hungatei* | 7BKB, 7BKC, 7BKC, 7BKD, 7BKE | BV | Source72 |
| *Rhodobacter capsulatus* | 6TG9, 6TGA | EV | This study |
| W FDH (1.17.1.9) | W (tungsten) containing | *Desulfovibrio gigas* | 1H0H | BV, MV | Source73 |
| *Desulfovibrio vulgaris* | 6SDR, 6SDV | BV, MV | Source74,75 |
| *Methanothermobacter wolfeii* | 5T5I, 5T5M, 5T61 |  |  |
| *Methylobacterium extorquens* | 7E5Z | BV, EV, NAD+ | This study |

The data was sourced from a reference of main manuscript30.

**Supplementary Table 2 | Mediator-dependent Gibbs free energy of CO hydration.**

| **Type of reaction** | **Reaction equation** | **Standard redox potential, *E*0 (mV)*** | **Change in standard Gibbs free energy, ΔG0 (kJ/mol)** | **Reference** |
| --- | --- | --- | --- | --- |
| MV reduction | MV2+ + e‒ → MV+• | ‒446 | 86.1 | Source76 |
| EV reduction | EV2+ + e‒ → EV+• | ‒449 | 86.6 | Source76 |
| BV reduction | BV2+ + e‒ → BV+• | ‒359 | 69.3 | Source76 |
| NAD+ reduction | NAD+ + e‒ + H+ → NADH | ‒315 | 61.0 | Source77 |
| CO oxidation | CO (g) + H2O → CO2 (g) + 2 H+ + 2 e‒ | 520 | ‒100.3 | Source78 |
| with MV2+ | CO (g) + H2O + 2 MV2+ → CO2 (g) + 2 H+ + 2 MV+• | 74† | ‒14.3 | This study |
| with EV2+ | CO (g) + H2O + 2 EV2+ → CO2 (g) + 2 H+ + 2 EV+• | 71† | ‒13.7 | This study |
| with BV2+ | CO (g) + H2O + 2 BV2+ → CO2 (g) + 2 H+ + 2 BV+• | 161† | ‒31.1 | This study |
| with NAD+ | CO (g) + H2O + NAD+ → CO2 (g) + H+ + NADH | 204† | ‒39.4 | This study |
| CO2 reduction | CO2 (g) + H+ + 2 e‒ → HCO2‒ (aq) | ‒430 | 83.0 | Source78 |
| with MV+• | CO2 (g) + H+ + 2 MV+• → HCO3‒ + 2 MV2+ | 16† | ‒3.1 | This study |
| with EV+• | CO2 (g) + H+ + 2 EV+• → HCO3‒ + 2 EV2+ | 19† | ‒3.7 | This study |
| with BV+• | CO2 (g) + H+ + 2 BV+• → HCO3‒ + 2 BV2+ | ‒71† | 13.7 | This study |
| with NADH | CO2 (g) + NADH → HCO3‒ + NAD+ | ‒114† | 22.0 | This study |
| CO hydration‡ | CO (g) + H2O → HCO2‒ (aq) + H+ | 90 | ‒17.4 | This study |

* The standard redox potential (*E*0), under standard conditions (pH 7 and 25°C), is derived from each respective reference.

† The standard redox potential (*E*0) is calculated inversely from the standard Gibbs free energy (Δ*G*0) using the equation *E*0 = ‒Δ*G*0/*nF*. *F* represents Faraday's constant (approximately 96,485 J/mol e‒), and *n* denotes the number of moles of electrons involved.

‡ The values for standard redox potential (*E*o) and standard Gibbs free energy (Δ*G*0) for CO hydration are derived from the summation of the values from CO oxidation and CO2 reduction. The resulting Δ*G*0 value of ‒17.4 kJ/mole suggests that this reaction occurs spontaneously.

**Supplementary Table 3 | The CO2 affinities in FDHs with metal active sites.**

| **Group (EC no.)** | **Name** | **Substrate*** | ***K*m (mM)** | **Temp. (°C)/pH** | **References** |
| --- | --- | --- | --- | --- | --- |
| FDH (1.17.1.9) | *Me*FDH1 | CO2 | 3.903 ± 0.475 | 30°C/pH 6.3 | This study |
|  | *Rc*FDH | CO2 | 0.250 ± 0.028 | 30°C/pH 6.3 | This study |

The CO2 affinities for *Me*FDH1 and *Rc*FDH were analyzed. The *K*m values were obtained by spectrophotometrically measuring the CO2 reduction reactions at pH 6.3 and 30°C in a 200 mM potassium phosphate buffer with 0.12 mM reduced EV and varying concentrations of sodium bicarbonate (3‒100 mM). The data represent the mean ± S.D., determined from *n*= 3 independent experiments. Abbreviations: FDH, formate dehydrogenase; red, reduced; *Me, Methylobacterium extorquens; Rc, Rhodobacter capsulatus*.

**Supplementary Table 4 | Gas compositions of industrial off-gas and waste plastic syngas.**

|  | | **COG** | **BFG** | **LDG** | **SRF-derived gas** |
| --- | --- | --- | --- | --- | --- |
| Component  (%) | CO | 6.2 ± 0.1 | 25.5 ± 0.3 | 49.4 ± 1.9 | 7.7 ± 0.9 |
| CO2 | 2.4 ± 0.1 | 23.6 ± 0.2 | 19.3 ± 0.6 | 42.8 ± 3.1 |
| H2 | 55.4 ± 0.5 | 3.8 ± 0.2 | 1.4 ± 0.4 | 2.6 ± 0.6 |
| N2 | 8.6 ± 0.6 | 46.7 ± 0.1 | 29.2 ± 1.9 | 38.5 ± 7.4 |
| CH4/CmHn | 27.3 ± 0.5 | ‒ | ‒ | 8.5 ± 2.7 |
| O2 | 0.1 ± 0.02 | 0.01 ± 0.00 | 0.01 ± 0.02 | ‒ |
| Reference | | Source25,30 | | | Source30 |

This data is modified from references25,30. The gas composition data represents the varying component ratios of CO and CO2 in different real off-gases. Industrial off-gases (COG, BFG, LDG) were captured from the Hyundai Steel process, while waste plastic syngas was captured from SRF gasification at the Korea Institute of Energy Research. SRF means solid recovered fuels.

**Supplementary Table 5 | Overview of biocatalytic production from gaseous substrates.**

| **Product** | **Catalysis** | **Name** | **Source** | **Related enzymes** | **Gas substrate type**‡ | **Gas substrate** | **Position** | **Titer (mM)** | **Productivity (mmol/g/h or mmol/m2/h)** | **Yield (%)** | **Reference** |
| --- | --- | --- | --- | --- | --- | --- | --- | --- | --- | --- | --- |
| Formate | Enzymatic catalysis | CO hydration | *Carboxydothermus hydrogenoformans, Methylobacterium extorquens* | Ni-CODH, W-FDH | Real off-gas | LDG | *In vitro* | 1800.0 | 61.4 | 100 | This study |
| *Cb*FDH/*Be*CA | *Candida boidinii* | CA, FDH | Single | CO2 | *In vitro* | 0.2 | 1.4 | ND | Source79 |
| *Cb*FDH/*Pp*FALDH/*Sc*ADH | *Candida boidinii* | FDH, FALDH, ADH, GDH, CA | Single | CO2 | *In vitro* | 0.1 | 21.0 | ND | Source80 |
| *Cn*FDH/*Ps*GDH | *Cupriavidus necator* | Mo-FDH, GDH | Single | CO2 | *In vitro* | 1.1 | 0.0022 | 3.93 | Source81 |
| Whole-cell catalysis | *Aw*WC | *Acetobacterium woodii* | Ni-CODH, FDH | Real off-gas | BFG | *In vivo* | 53.1 | 0.06 |  | Source23 |
| *AwHDCR* | *Acetobacterium woodii* | FDH, H2ase | Single | HCO3- | *In vivo* | 280.0 | 30.0 | 16.7 | Source9 |
| *Cc*WC | *Clostridium carboxidivorans* | W-FDH | Single | HCO3- | *In vivo* | 14.5 | 0.01 | 5.4 | Source82 |
| *Dd*WC | *Desulfovibrio desulfuricans* | Mo-FDH | Single | CO2 | *In vivo* | 45.0 | 7.0 | ND | Source83 |
| *Pf*WC | *Pyrococcus furiosus* | FDH | Single | HCO3- | *In vivo* | 44.0 | 0.03 | 17.6 | Source82 |
| Electrocatalysis† | *Cl*FDH | *Clostridium ljungdahlii* | FDH | Single | CO2/HCO3- | *In vitro* | 6.0 | 14.2 | ND | Source84 |
| *Ec*FDH | *Escherichi coli* | Mo-FDH | Single | HCO3- | *In vitro* | 0.000431 | 3.6 | ND | Source85 |
| *Mm*HDR | *Methanococcus maripaludis heterodisulfide reductase supercomplex* | HDR complex | Single | CO2 | *In vitro* | 13.0 | 1.2 | ND | Source86 |
| Photocatalysis | *Cl*FDH | *Clostridium ljungdahlii* | FDH | Single | CO2/HCO3- | *In vitro* | 0.002 | 0.98 | ND | Source87 |
| Methanol | Enzymatic catalysis | *Cb*FDH/*Pp*FALDH/*Ss*ADH | *Candida boidinii* | FDH, FALDH, ADH, PTDH | Single | CO2 | *In vitro* | 0.9 | 1.4 | ND | Source88 |
| Ethanol | Whole-cell catalysis | *Cc*WC | *Clostridium carboxidivorans* P7 | ‒ | Real off-gas | Producer gas | *In vivo* | 108.5 | 0.45 | ND | Source89 |
| *Cl*WC | *Clostridium ljungdahlii* | ‒ | Mixed | CO/CO2/H2 | *In vivo* | 91.2 | 1.9 | ND | Source90 |
| *Bm*WC | *Butyribacterium methylotrophicum* | ‒ | Mixed | CO/CO2/H2 | *In vivo* | 0.00043 | 0.0081 | ND | Source91 |
| *Ca*WC | *Clostridium autoethanogenum* | H2ase, FDH | Mixed | CO/CO2/H2 | *In vivo* | 31.0 | 10.5 | ND | Source92 |
| *Ms*WC | *Moorella sp.* HUC22-1 | ACDH, ADH | Mixed | CO2/H2 | *In vivo* | 124.8 | 17.3 | ND | Source93 |
| Isobutanol,  3-Methyl-1-butanol | Whole-cell catalysis | *Cn*WC | *Cupriavidus necator* | ‒ | Single | CO2 | *In vivo* | 1.8 | 2.0 | ND | Source94 |
| 2,3-Butanediol | Whole-cell catalysis | *Se*WC | *Synechococcus elongatus* PCC 7942 | ‒ | Single | HCO3- | *In vivo* | 63.2 | 0.30 | ND | Source95 |
| Methane | Electrocatalysis† | *Mt*WC | *Methanothermobacter thermoautotrophicus* | ‒ | Single | CO2 | *In vitro* | 27.2 | 46.0 | ND | Source96 |

To compare yield, titer, and productivity, we utilized values from research studies referenced in the review article97 and from recently published relevant studies. When not provided, we based our calculations on measurements reported in the associated references.

†For electrocatalysis and photocatalysis, productivity was expressed in mmol/m2/h.

‡Gas substrates were classified into three types according to the number of materials used. CO2 and bicarbonate were considered as the same substrate.

§ND, not determined. Cases where yield could not be calculated due to the continuous flow method application were denoted as 'not determined (ND)'.

Abbreviations: ADH, alcohol dehydrogenase; ACDH, acetaldehyde dehydrogenase; CA, carbonic anhydrase; FALDH, formaldehyde dehydrogenase; FDH, formate dehydrogenase; GDH, glucose dehydrogenase; HDR, heterodisulfide reductase; HDCR, hydrogen-dependent CO2 reductase; H2ase, hydrogenase; Mo-FDH, molybdenum-containing FDH; Ni-CODH, nickel-containing carbon monoxide dehydrogenase; PTDH, phosphite dehydrogenase; W-FDH, tungsten-containing FDH; WC, whole-cell catalyst.

**Supplementary Table 6 | The list of genes used in this study.**

| **Group** | **Name** | **Origin** | **Gene (Uniprot code)** | **Vector** | **Host** | **Reference** |
| --- | --- | --- | --- | --- | --- | --- |
| CODH | *Ch*CODH2 WT | *Carboxydothermus hydrogenoformans* | cooS2 (Q9F8A8) | pET28a(+) | *E. coli* BL21 | Source25 |
| *Ch*CODH2 A559W | *C. hydrogenoformans* | ‒ | pET28a(+) | *E. coli* BL21 | Source25 |
| *Ch*CODH4 | *C. hydrogenoformans* | cooS4 (Q3AE44) | pET28a(+) | *E. coli* BL21 | Source25 |
| *To*CODH | *Thermococcus onnurineus* | cooS (B6YWP3) | pET28a(+) | *E. coli* BL21 | Source33 |
| FDH | *Me*FDH1 | *Methylobacterium extorquens* AM1 | fdh1A (C5ATT7)  fdh1B (C5ATT6) | pCM110 | *M. extorquens* | Source35 |
| *Rc*FDH | *Rhodobacter capsulatus* | fdhA (D5AQH0)  fdhB (D5AQH1)  fdhC (D5AQH2)  fdhE (D5AQG8) | pTrcHis A | *E. coli* MC1061 | Source37 |
| *Ts*FDH | *Thiobacillus* species KNK65MA | fdh (Q76EB7) | pUC57 | *E. coli* BL21 | Source38 |
| pRKISC | ISC Fe-S cluster assembly proteins | *Azotobacter vinelandii,* | iscS (O31269)  iscU (O31270) | pRK415 | *E. coli* BL21 | Source50 |
| *Escherichia coli* | iscA (P0AAC8)  hscB (P0A6L9)  hscA (P0A6Z1) |
| *Haemophilus influenzae* | fdx (P44428) |

In the study, the CODHs and FDHs used were prepared for protein expression as described in previous references from our research group. For detailed information, refer to the methods section.

**Supplementary Table 7 | Purity of formate salts from the enCOH reaction.**

| **Category**† | **HCOONa** | **HCOOK** | **HCOONH4** |
| --- | --- | --- | --- |
| Produced formate concentration (M) | 1.1 | 1.2 | 1.8 |
| Collected volume (mL) | 83.0 | 94.0 | 89.0 |
| Produced formate moles (mmol) | 91.3 | 113.7 | 162.0 |
| Total purified product mass (g)‡ | 4.8 | 7.9 | 5.9 |
| Purified formate salt mass (g) | 4.3 | 7.5 | 5.4 |
| Formate salt molecular weight (g/mol) | 68.0 | 84.1 | 63.1 |
| Purified formate salt moles (mmol) | 63.2 | 89.2 | 85.6 |
| Purity (%) | 88.8 | 94.6 | 92.1 |

† During 64 hours of enCOH with LDG, products were collected as formate salts (HCOONa, HCOOK, HCOONH4), each neutralized with a different agent (NaOH, KOH, NH4OH).

‡ The total purified product refers to the dried salt-type powder separated by activated carbon.

*Purity (%) = (mass of formate salt) / (mass of total purified product).

**Supplementary Table 8 | EnCOH enzyme preparation for 10 L reactor field operation.**

| **Category** | ***Ch*CODH2 A559W** | ***Me*FDH1** |
| --- | --- | --- |
| Enzyme for 10L reaction (kU) | 100 | 200 |
| Specific activity (U·mg‒1) | 4,800 ± 580 | 25.4 ± 2.5 |
| Cell mass (g wet weight·L‒1) | 7.9 | 40.3 |
| Enzyme yield (mg protein·mg cell‒1) | 5.3 | 15.0 |
| Total enzyme activity (kU·L‒1) | 199 | 15.9 |
| Volume required (L) | 0.5 | 12.6 |


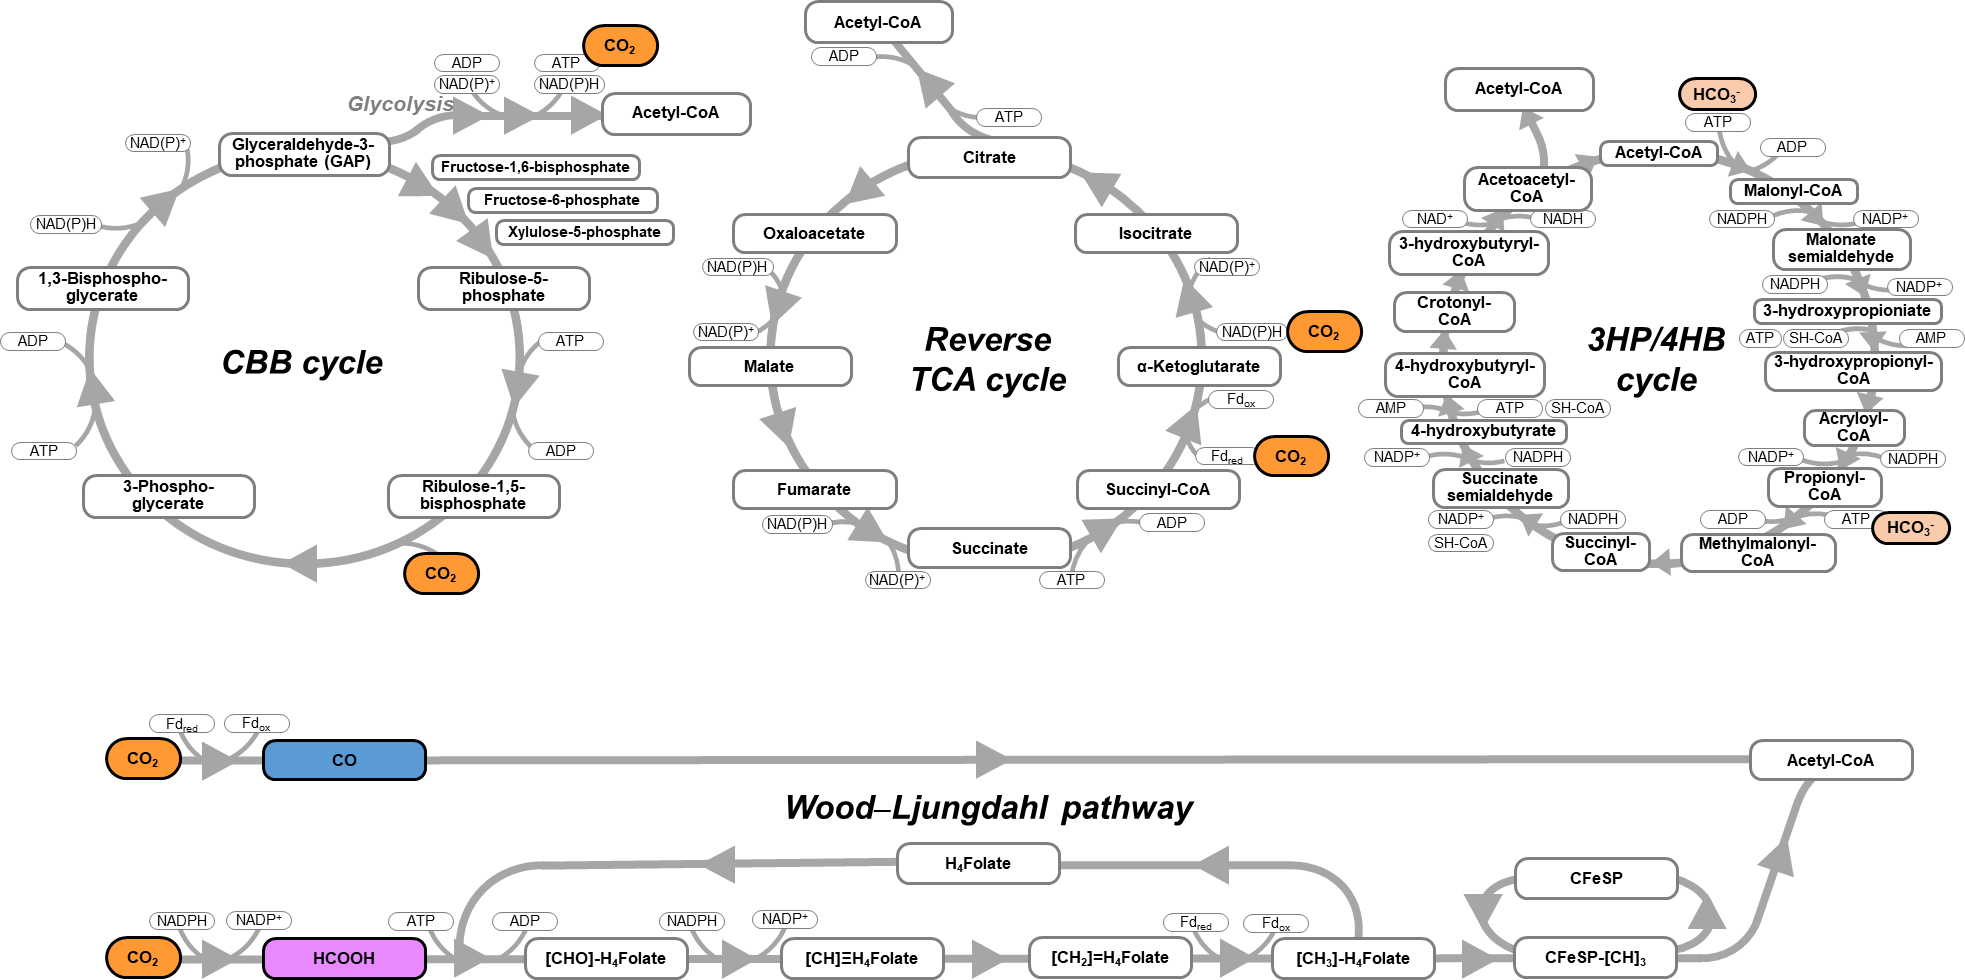


**Supplementary Figure 1 | The linear Wood‒Ljungdahl pathway and various circular cycles for CO2 fixations.** Circular cycles, namely the Calvin‒Benson‒Bassham (CBB), reverse Tricarboxylic Acid (TCA), and 3-Hydroxypropionate/4-Hydroxybutyrate (3HP/4HP) cycles, are known to be involved in CO2-fixation. The information regarding these CO2-fixation pathways is modified from a reference source12.

**
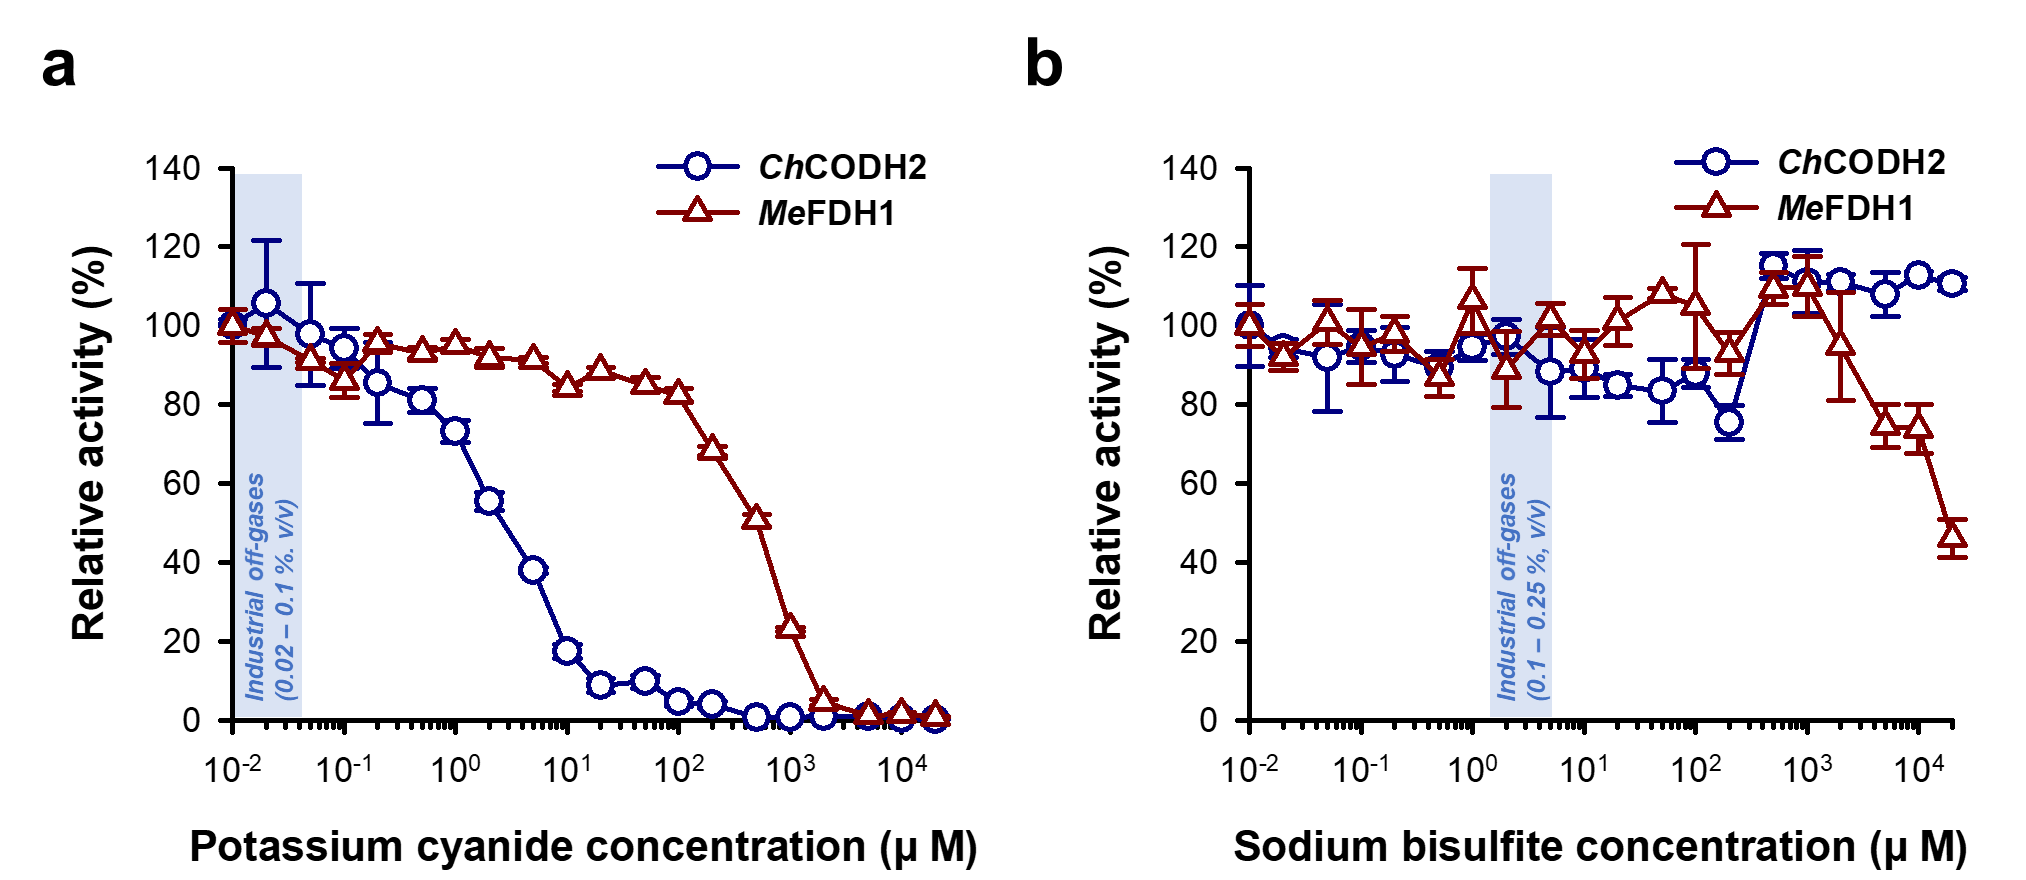
**

**Supplementary Figure 2 | enCOH enzymes’ response to toxic inhibitors existing industrial off-gases. a**, Cyanide effects of *Ch*CODH2 and *Me*FDH1. **b**, SOx effects of *Ch*CODH2 and *Me*FDH1. In the inhibition test, residual activities of enCOH enzyme CODH and FDH were measured by conducting reactions at pH 6.5 and 30°C, varying concentrations of different inhibitors (cyanide and SOx). The data represent the mean ± S.D., determined from *n*= 3 independent experiments.

**
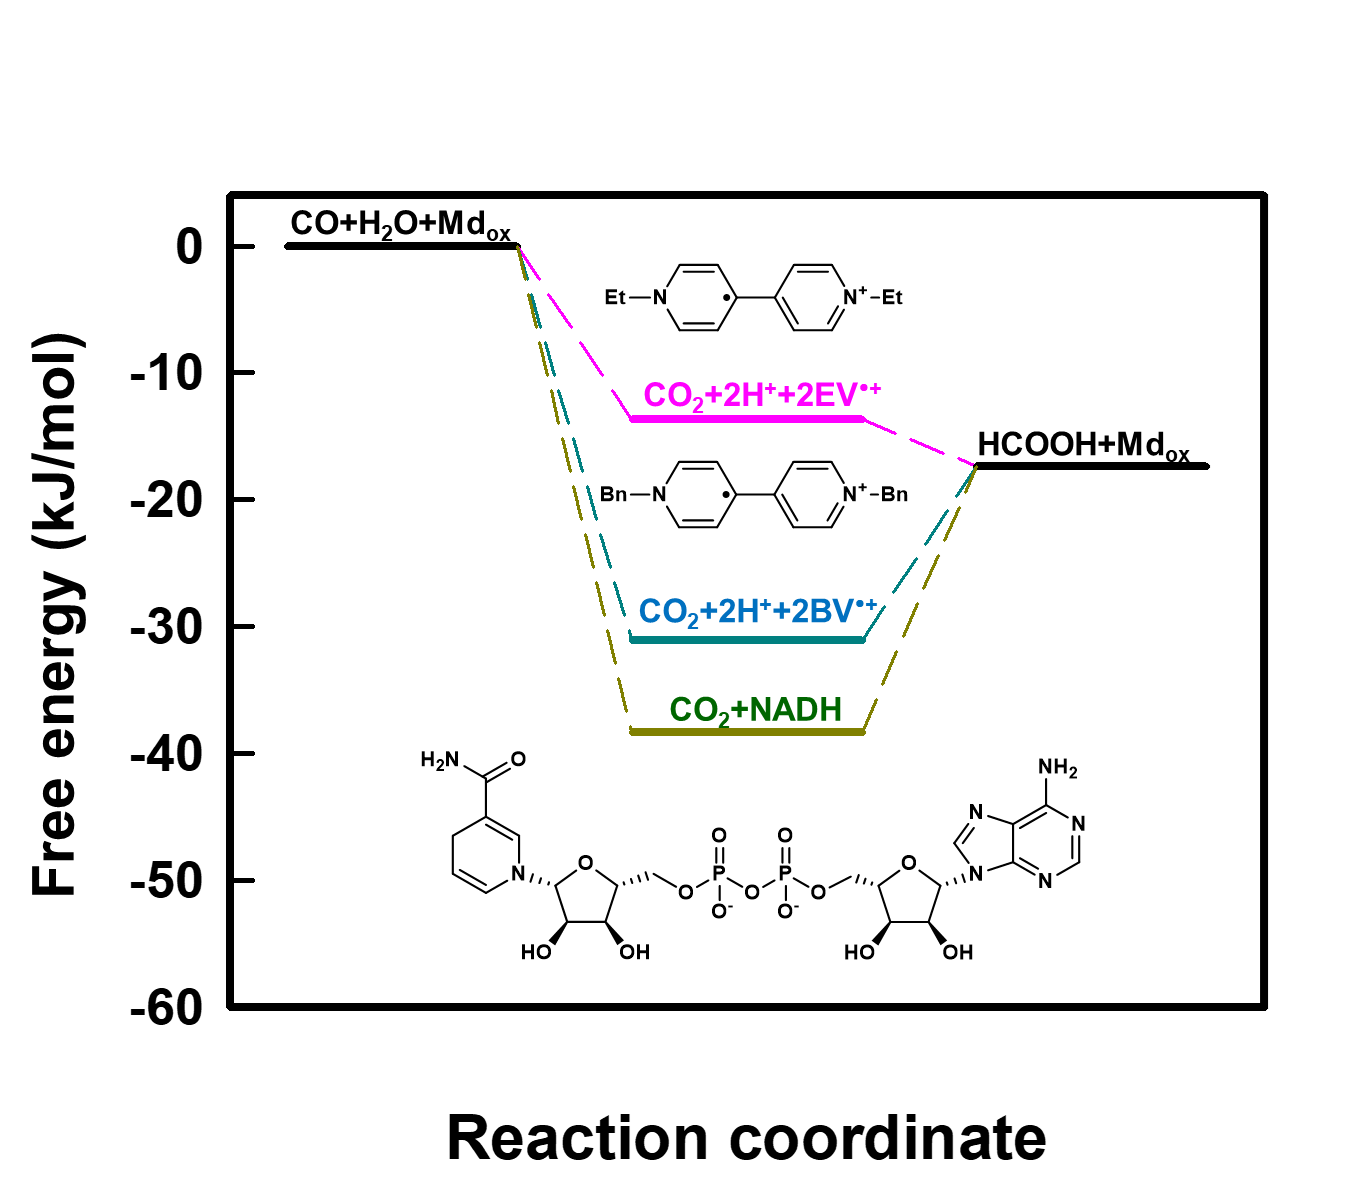
**

**Supplementary Figure 3 | Gibbs free energy depending on three mediators in CO hydration.** The Gibbs free energy for each mediator was calculated based on the redox potential at pH 7 and 25°C. Among the three mediators, only EV exhibited spontaneous reactivity in both CO oxidation and CO2 reduction reactions. All redox potentials used were derived from the reference values listed in Supplementary Table 2.


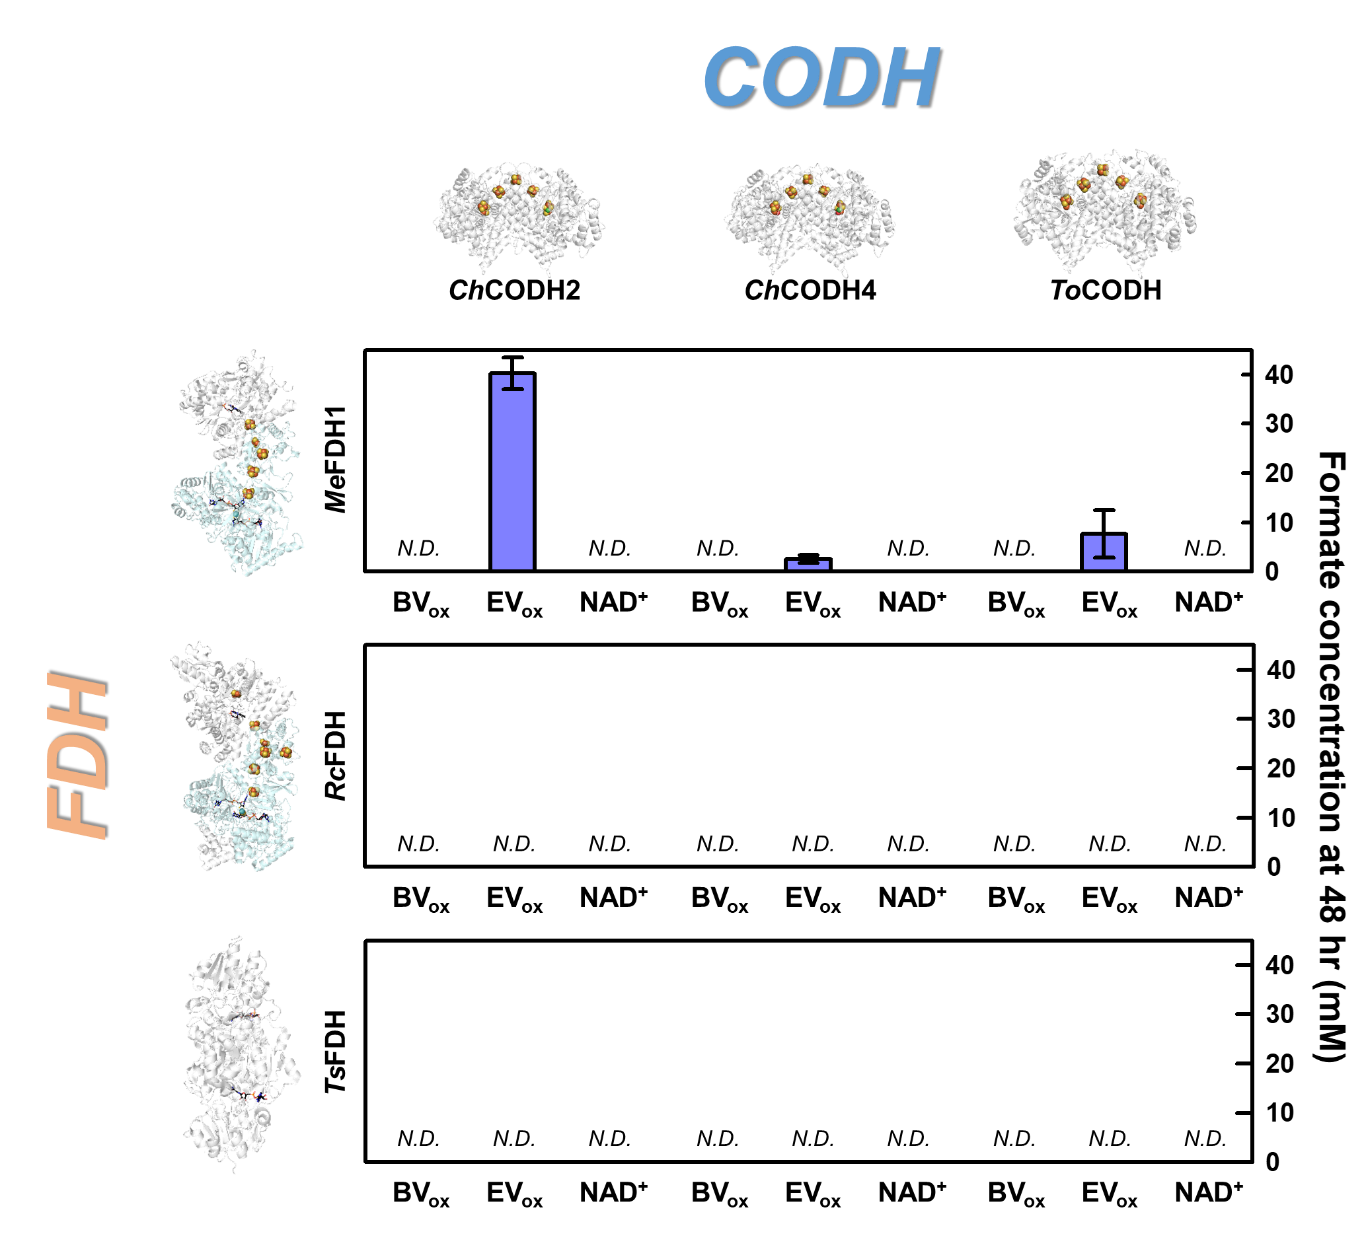


**Supplementary Figure 4 | Formate production as a mediator type through CODH‒FDH combination.** The productivity of formate, observed over a period of 48 hours, was evaluated using a combination of CODH and FDH, with three different mediators: BVox, EVox, and NAD+. The data represent the mean ± S.D., determined from *n*= 3 independent experiments.

**
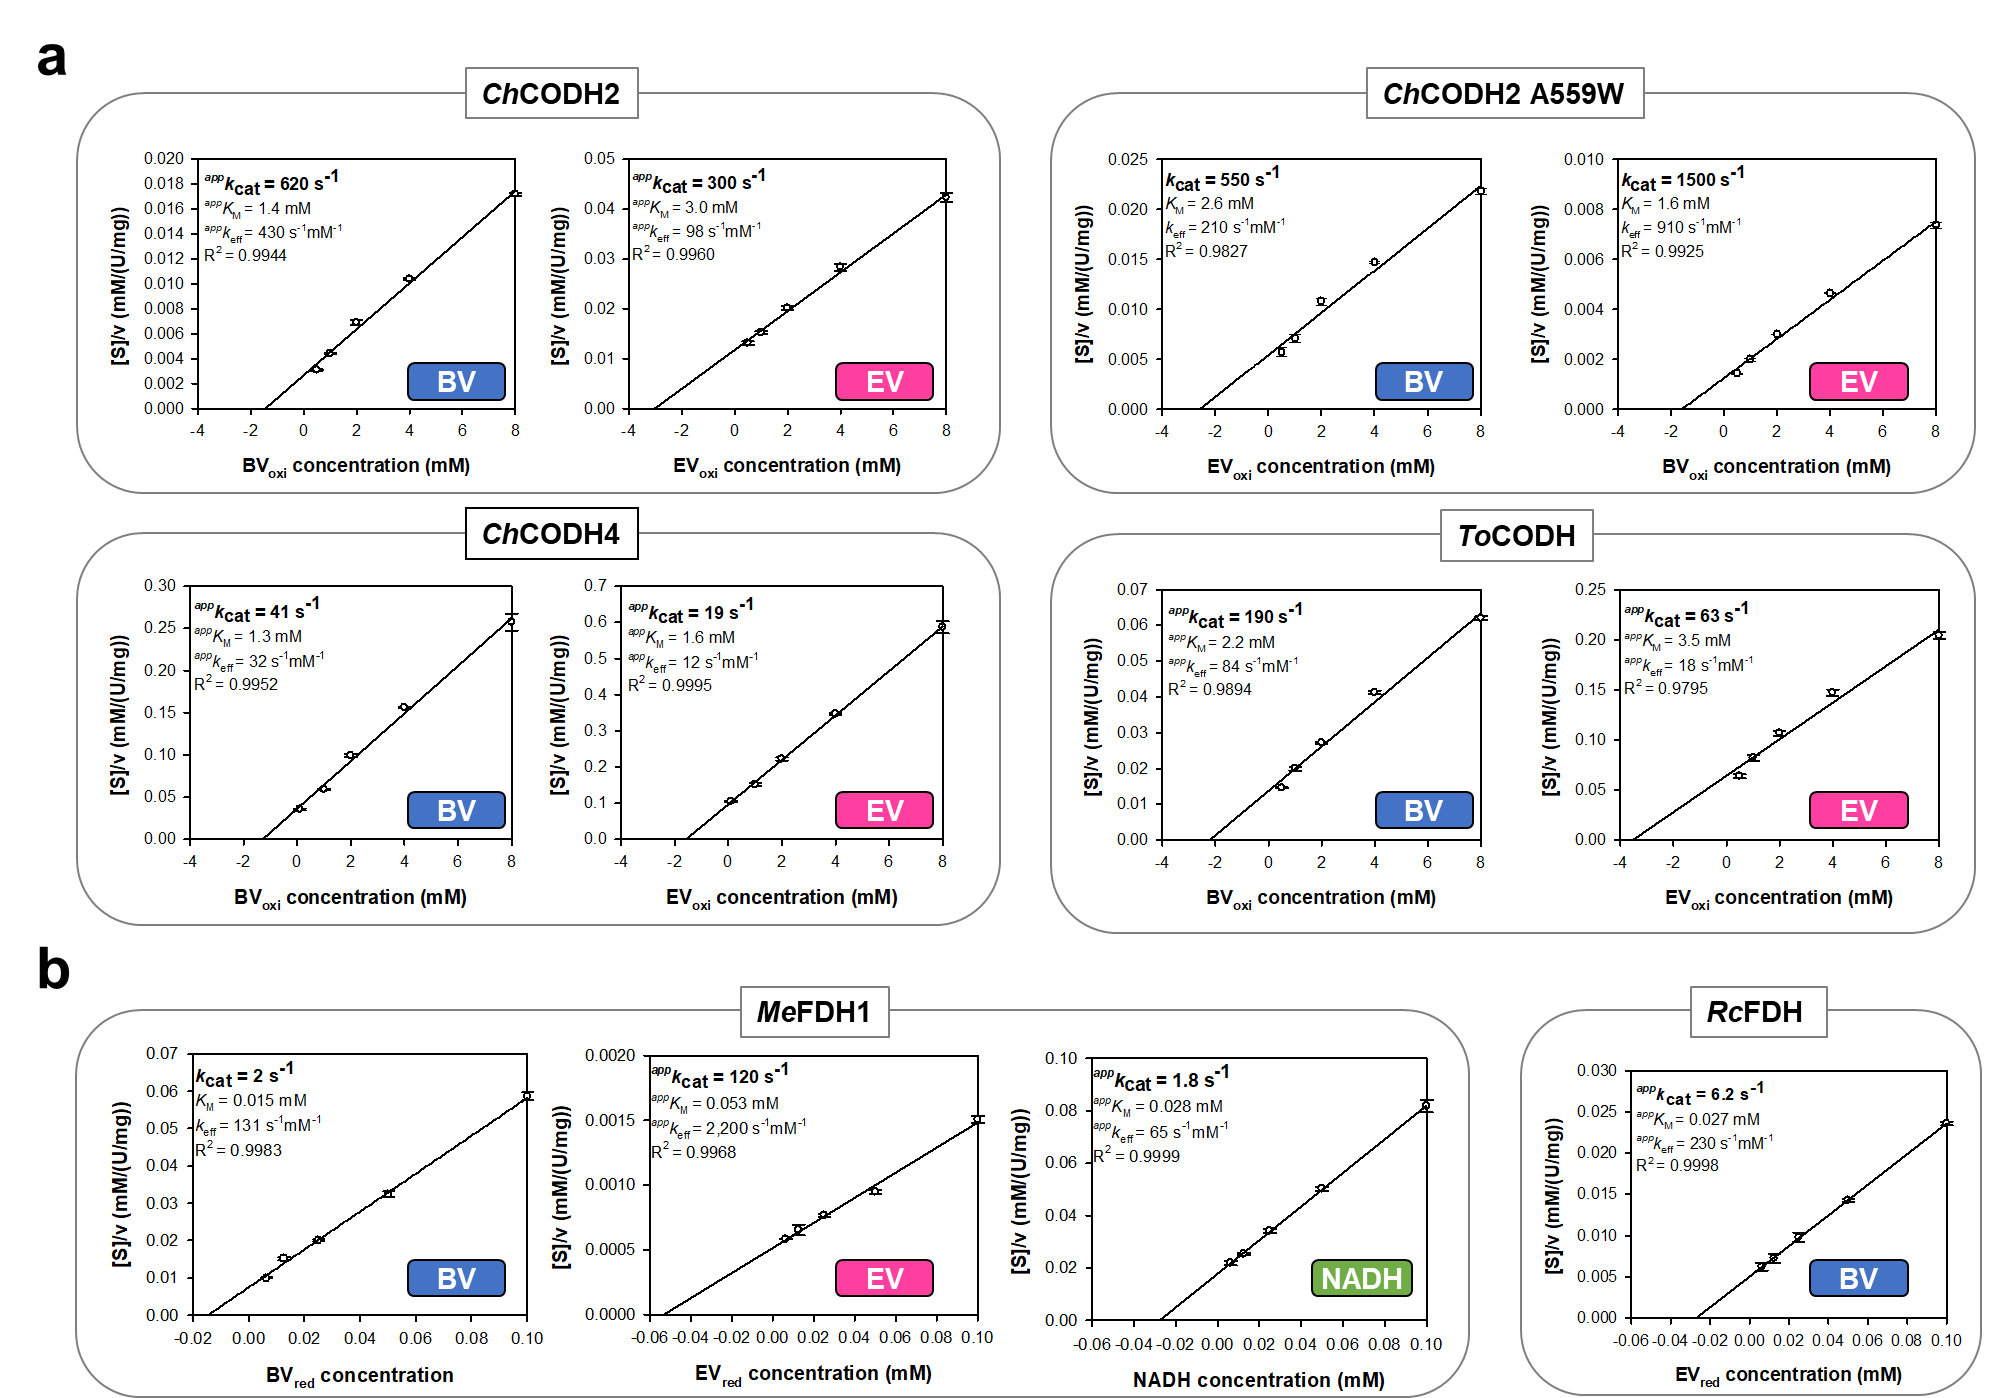
**

**Supplementary Figure 5 | Hanes‒Woolf plots of the enCOH enzymes.** The kinetic properties of CODHs and FDHs for mediators were estimated from Hanes–Woolf plots. **a,** CODHs. **b,** FDHs. The values of *k*cat were calculated from *V*max for BV, EV, and NADH. The data represent the mean ± S.D. determined from *n*= 3 independent experiments.

**
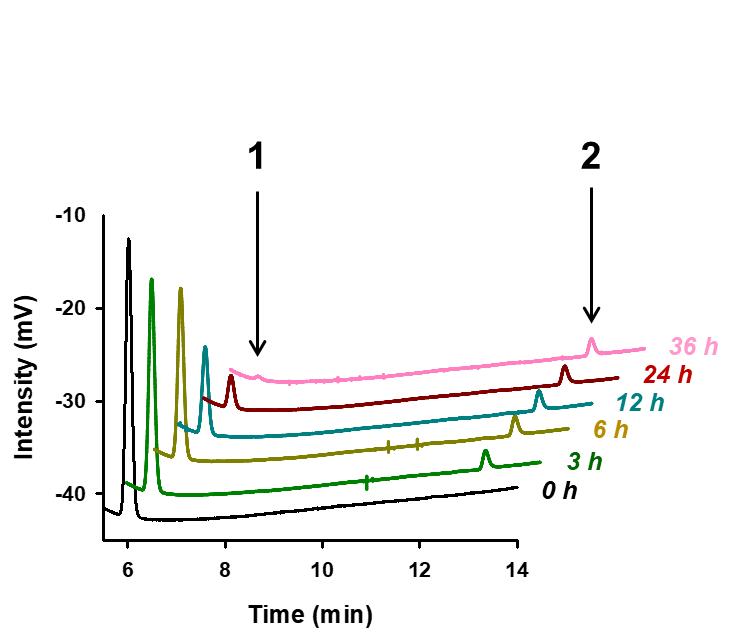
**

**Supplementary Figure 6 | Analysis of gaseous compounds during enCOH reaction by gas chromatography.** The gas substrates CO and intermediate CO2 changes during the enCOH reaction were analyzed by GC, utilizing a close enzyme reaction system. Over a period of 36 hours, a gradual decrease in CO concentration and a sustained level of CO2 concentration after 3 hours of initial reaction were observed. The products were identified by comparison with authentic standards (peak 1, CO; peak 2, CO2).

**
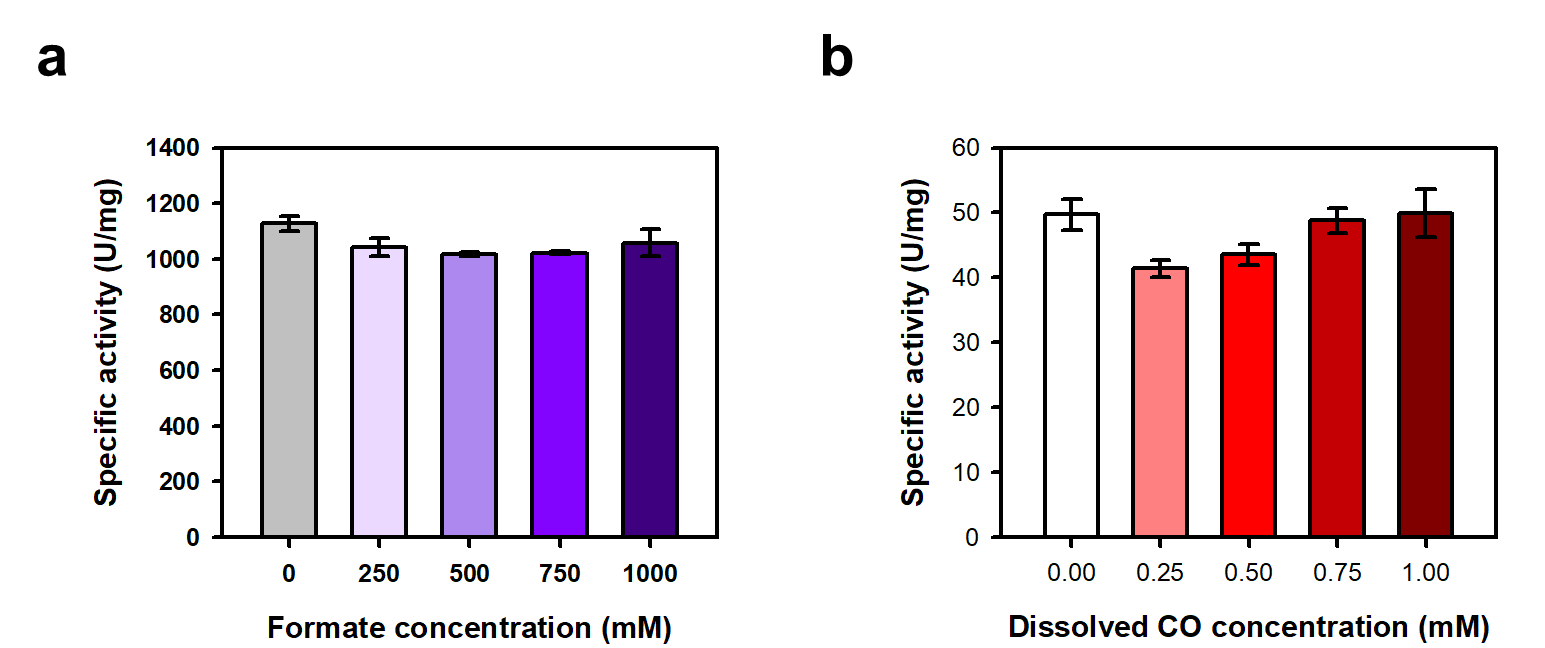
**

**Supplementary Figure 7 | Inhibitory cross-talks. a**, Formate effect on *Ch*CODH2. **b**, CO effect on *Me*FDH1. The data represent the mean ± S.D., determined from *n*= 3 independent experiments.


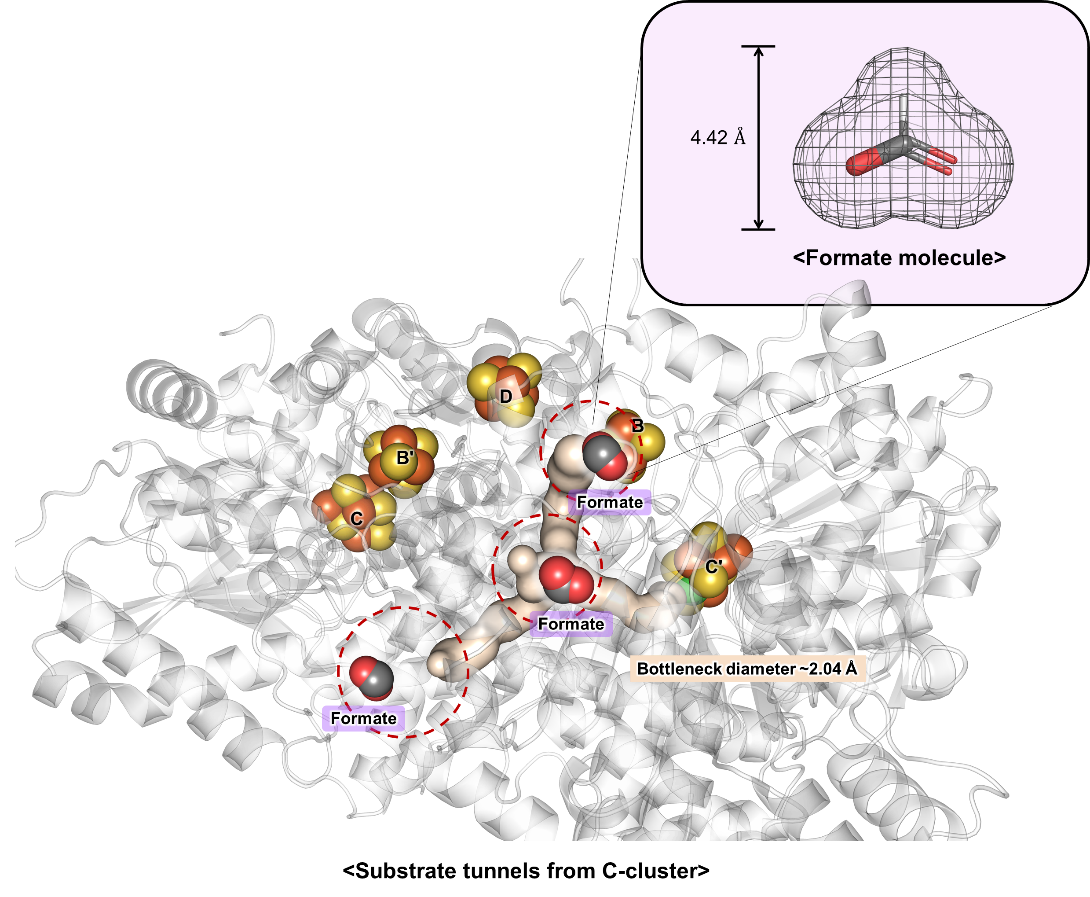


**Supplementary Figure 8 | Formate' inability to traverse substrate tunnels due to size constraints.** The overall size of formate is calculated to be 4.42 Å (a grey mesh). The distance between H and O is 1.7 Å, with the Van der Waals radius of H being 1.2 Å and the Van der Waals radius of O being 1.52 Å. Moreover, the bottleneck diameter of the substrate tunnels, derived from the C-cluster in *Ch*CODH2, was measured to be approximately 2.04 Å. It is predicted that the size of formate molecules hinders their entry at the entrance of the substrate tunnels (depicted by a red dot). The substrate tunnels were predicted to pass through CAVER analysis98.


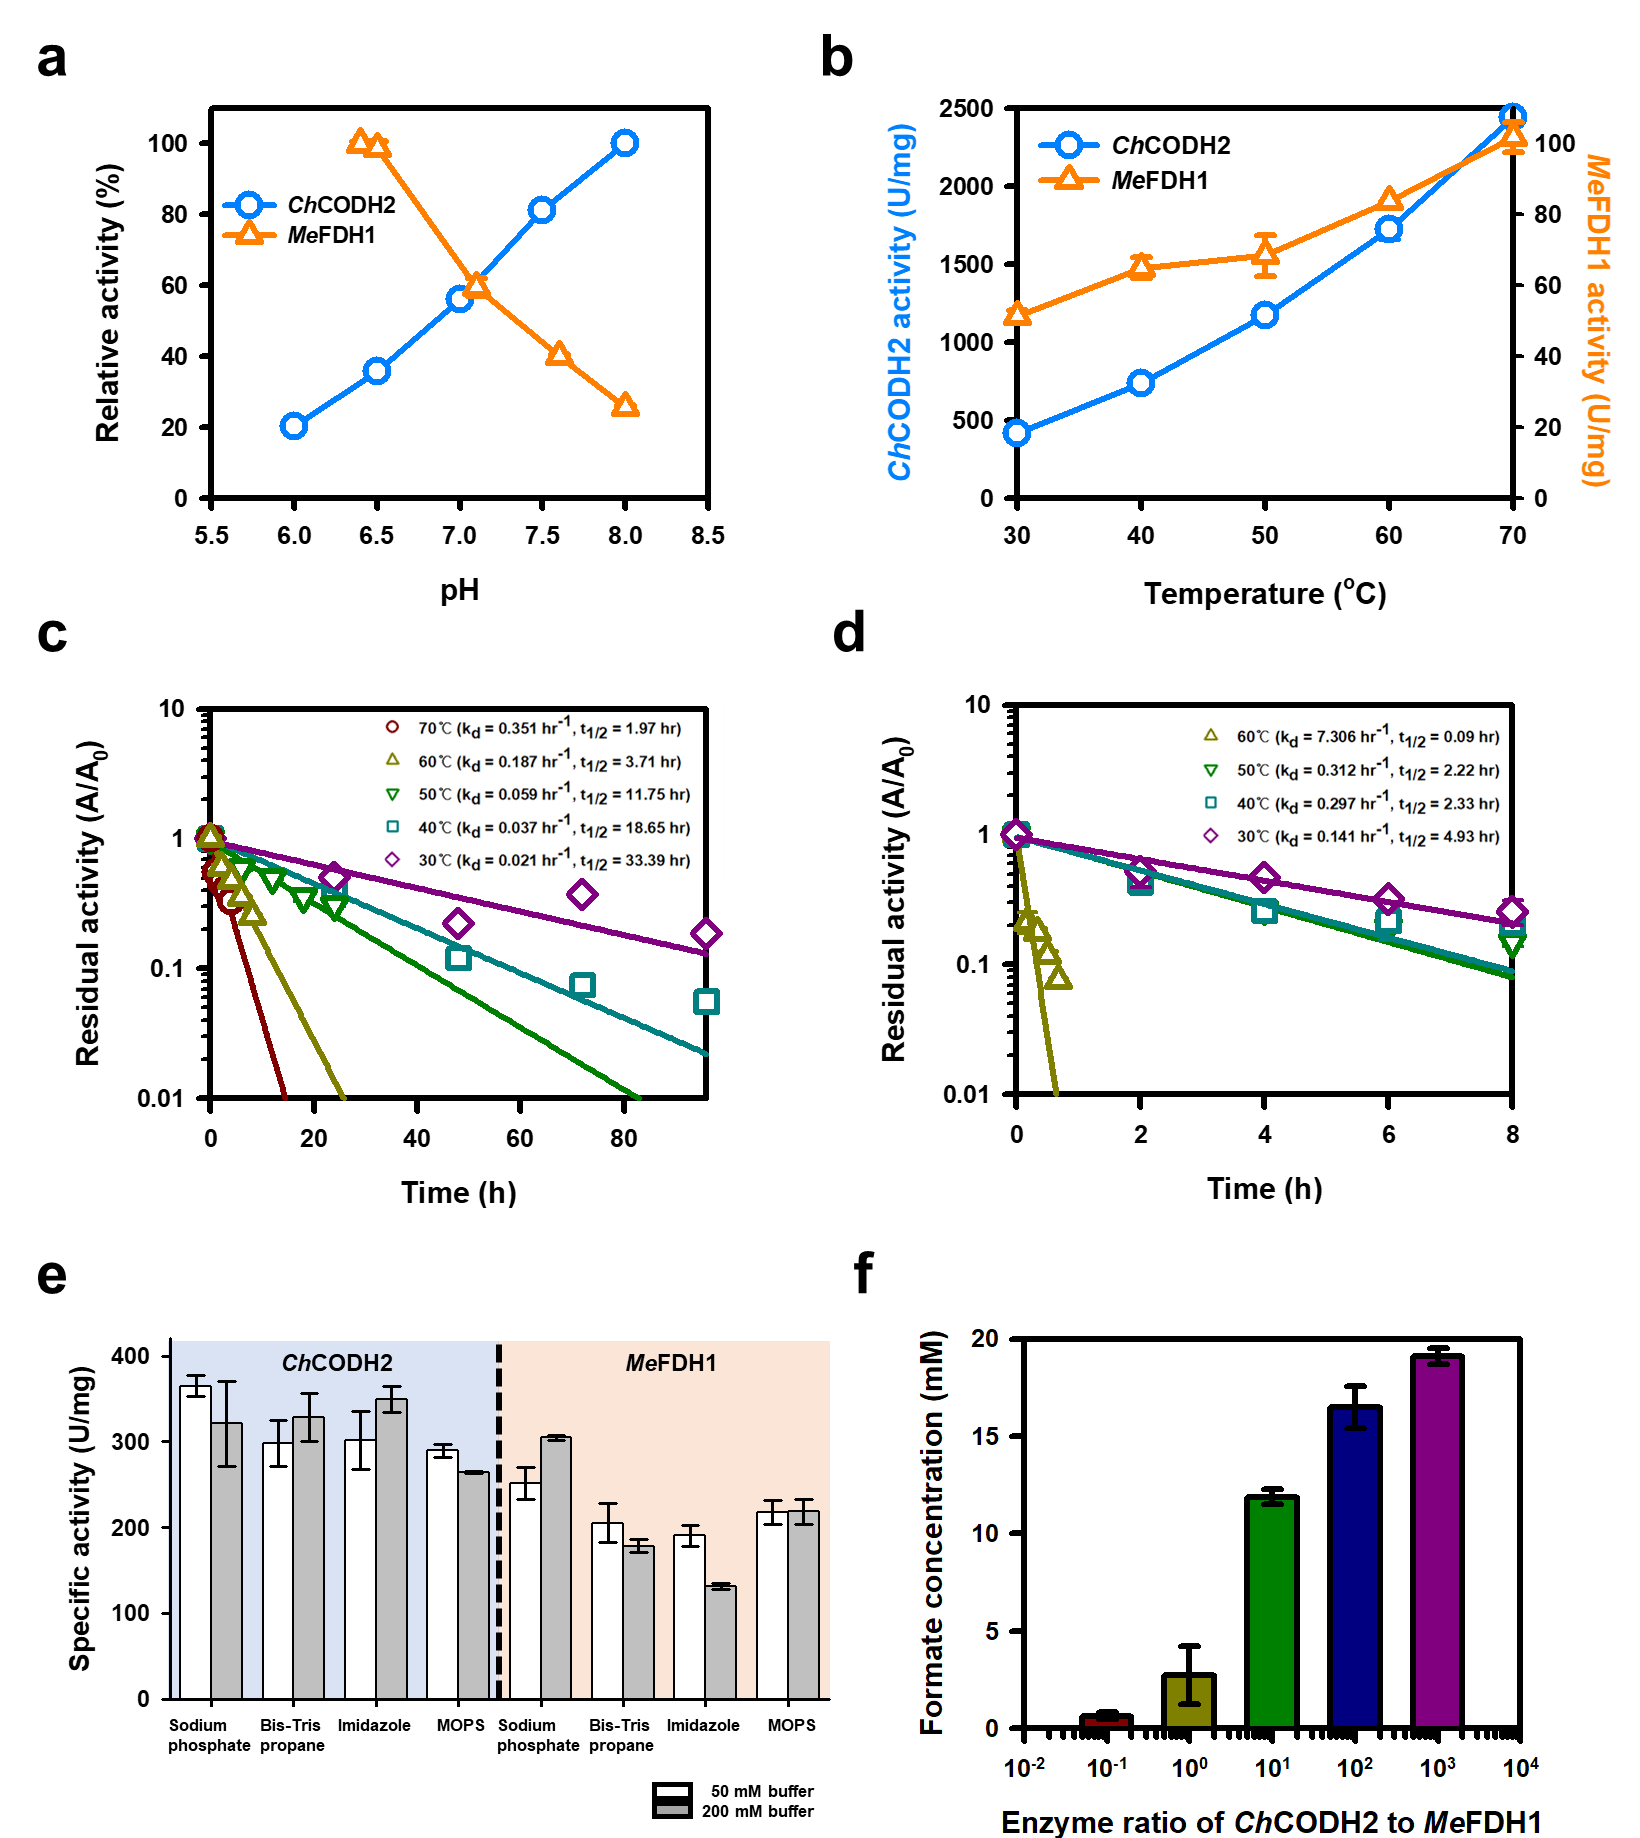


**Supplementary Figure 9 | Physicochemical conditions and the enzyme ratio for enCOH system. a**, pH profiles of *Ch*CODH2 and *Me*FDH1. **b**, Temperature profile of *Ch*CODH2 and *Me*FDH1. **c**, Kinetic stability profile of *Ch*CODH2. **d**, Kinetic stability of *Me*FDH1. **e**, Effect of buffers to *Ch*CODH2 and *Me*FDH1. **f**, Enzyme ratio of *Ch*CODH2 to *Me*FDH1. The data represent the mean ± S.D., determined from *n*= 3 independent experiments.

**
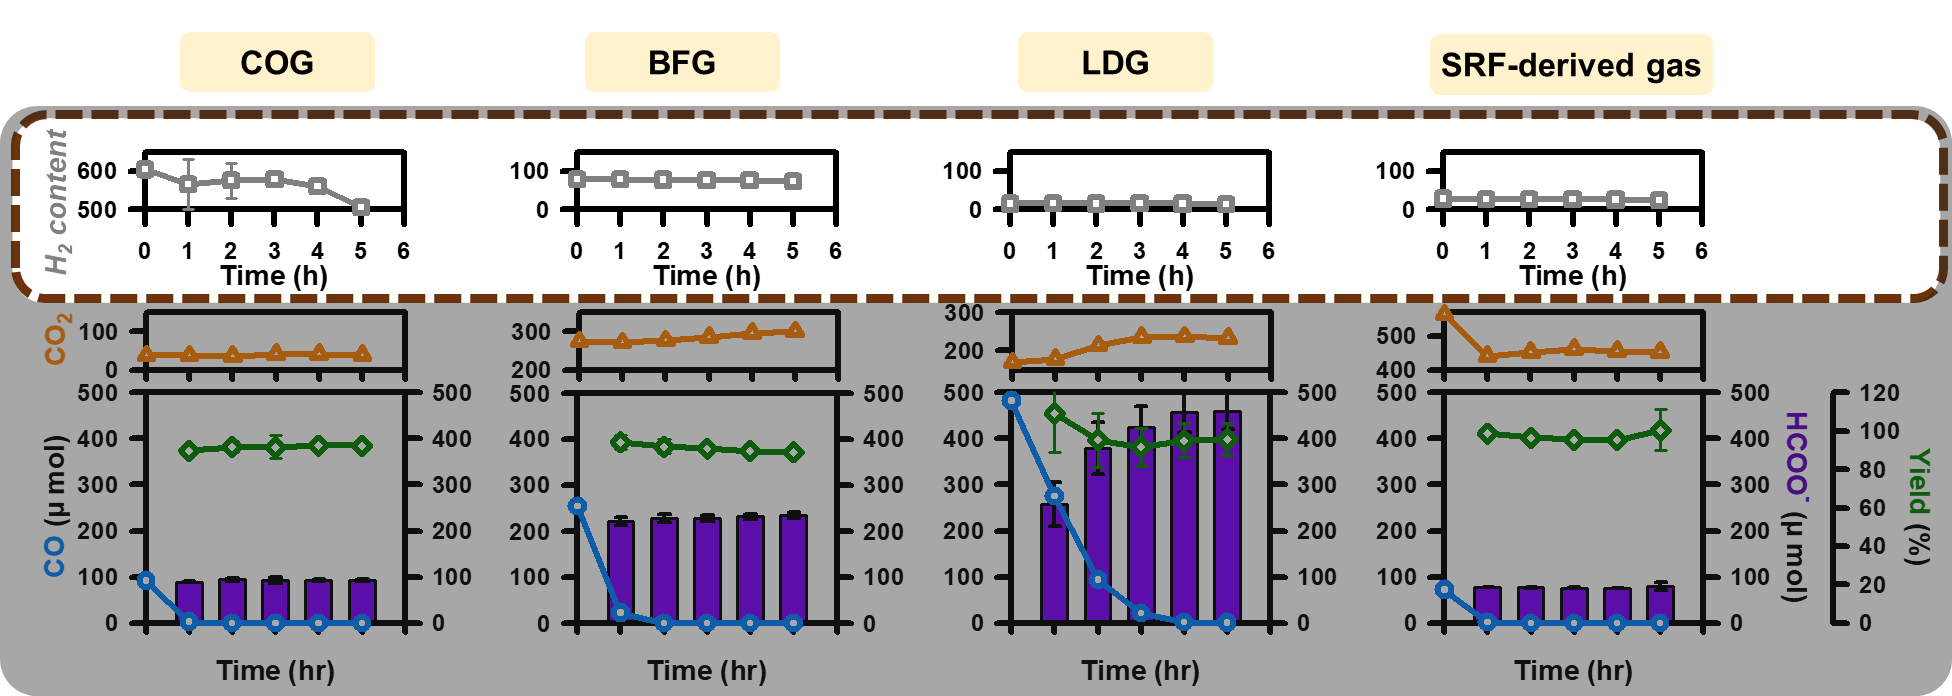
**

**Supplementary Figure 10 | H2 gas component changes during enCOH reaction.** During the enCOH enzyme reaction, changes in the gas components of CO and CO2, as well as the variation in the amount of H2 gas, were measured using GC analysis. It observed that the initial amount of hydrogen present in each real off-gas sample remained constant throughout the reaction, without any changes. The data represent the mean ± S.D., determined from *n*= 3 independent experiments.

**
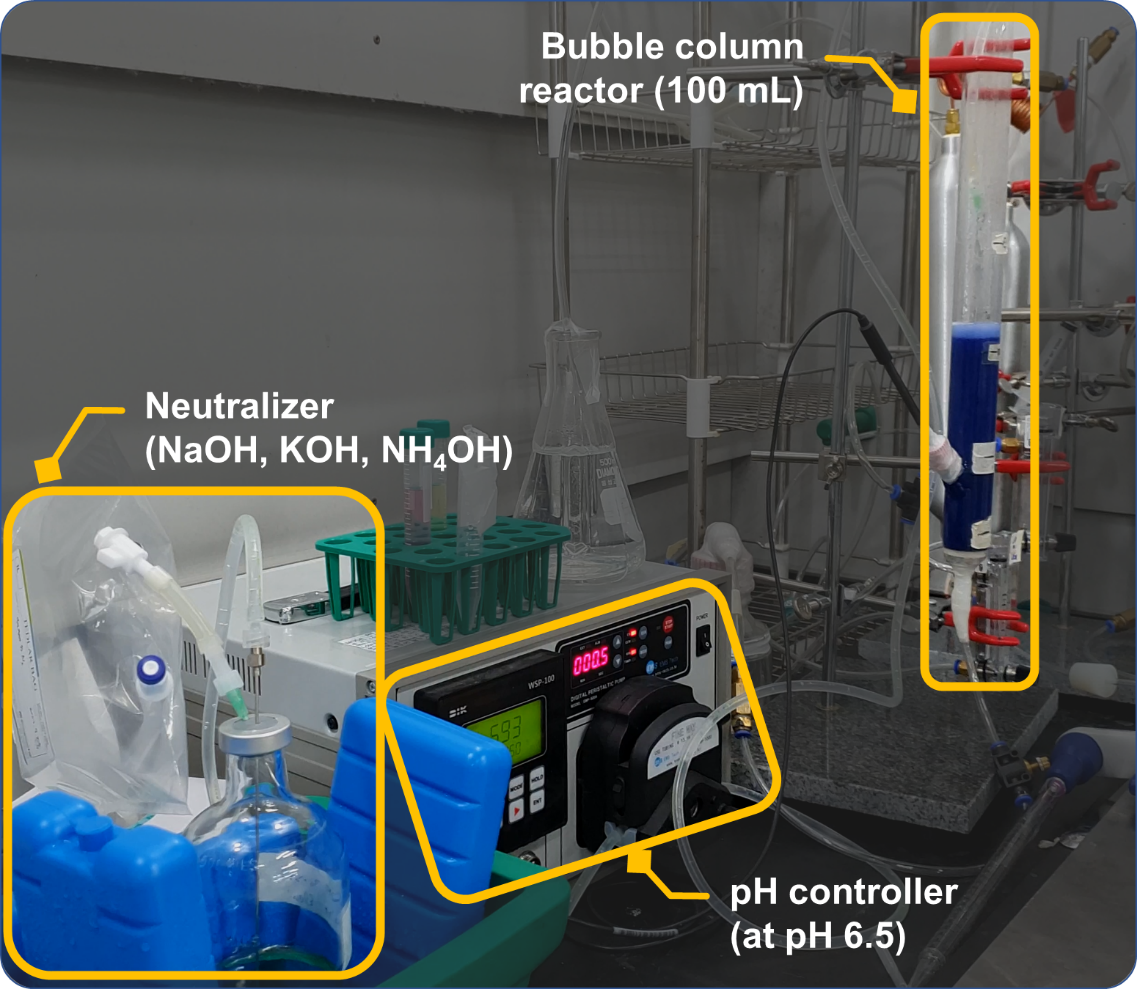
**

**Supplementary Figure 11 | Operation of 100 mL-scale reactor.** The 100 mL-scale enzyme reactor in the form of a gas bubble column was fabricated for the enzymatic reaction of enCOH in continuous gas supply. The gas bubble column design was chosen due to its large surface area, high gas transfer rate, reaction efficiency, simplicity of structure, ease of handling, and scalability advantages in enzymatic reactions with gas substrates. Real LDG gas was supplied to the enzyme reactor via a tube at a volume of 100 mL, and within the reactor, the CO hydration reaction was carried out at room temperature by immobilized enCOH enzymes. The pH of the reactor was maintained at 6.5 through the supply of neutralizer to counter the production of formate. The generated formate was observed through HPLC analysis.

**
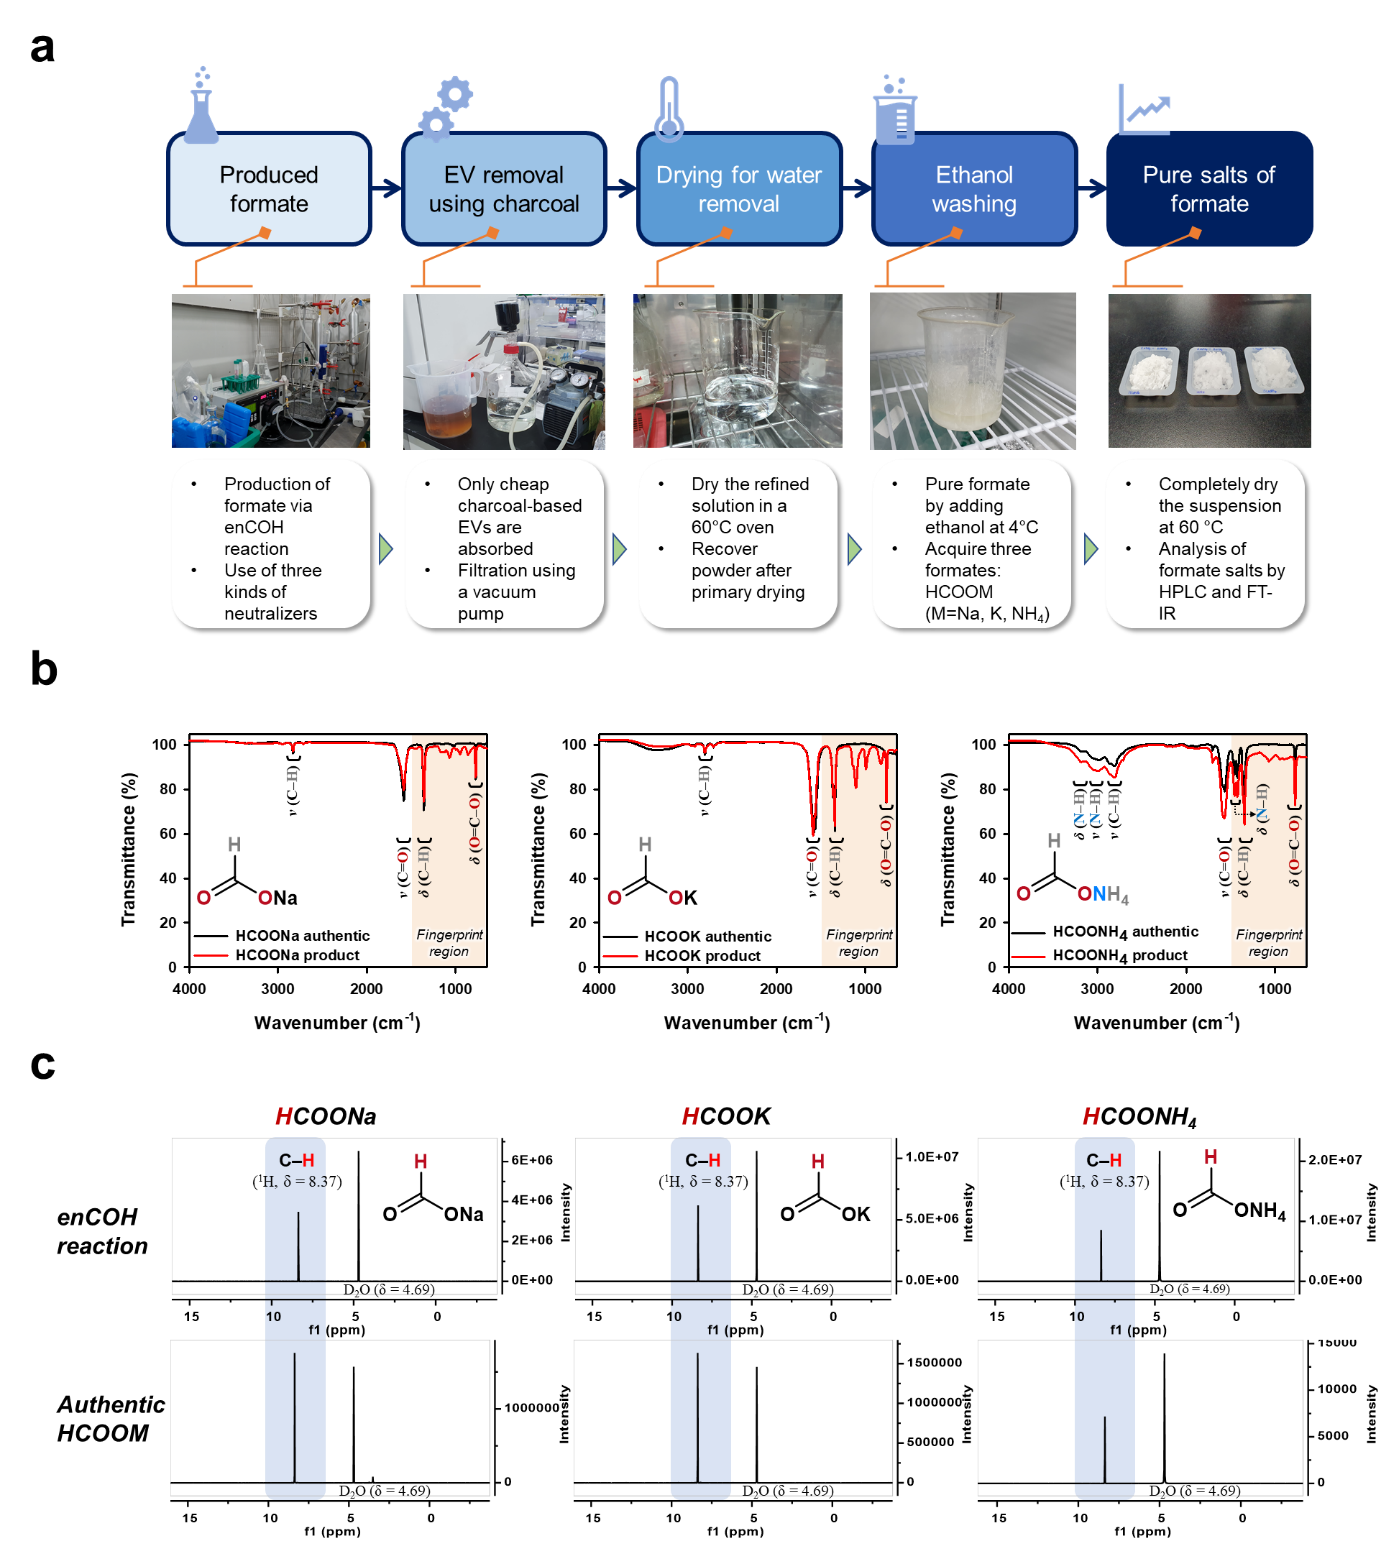
**

**Supplementary Figure 12 | Salt formate analysis and its separation. a**, Diagram of formate separation. **b**, FT-IR of formate salts. **c**,1H NMR of three formate salts. Additionally, the hydrogen atoms of formate salts were observed in the 1H-NMR spectrum99, with D2O as the reference (D2O, δ = 4.69 ppm; formate, δ = 8.37 ppm).

**
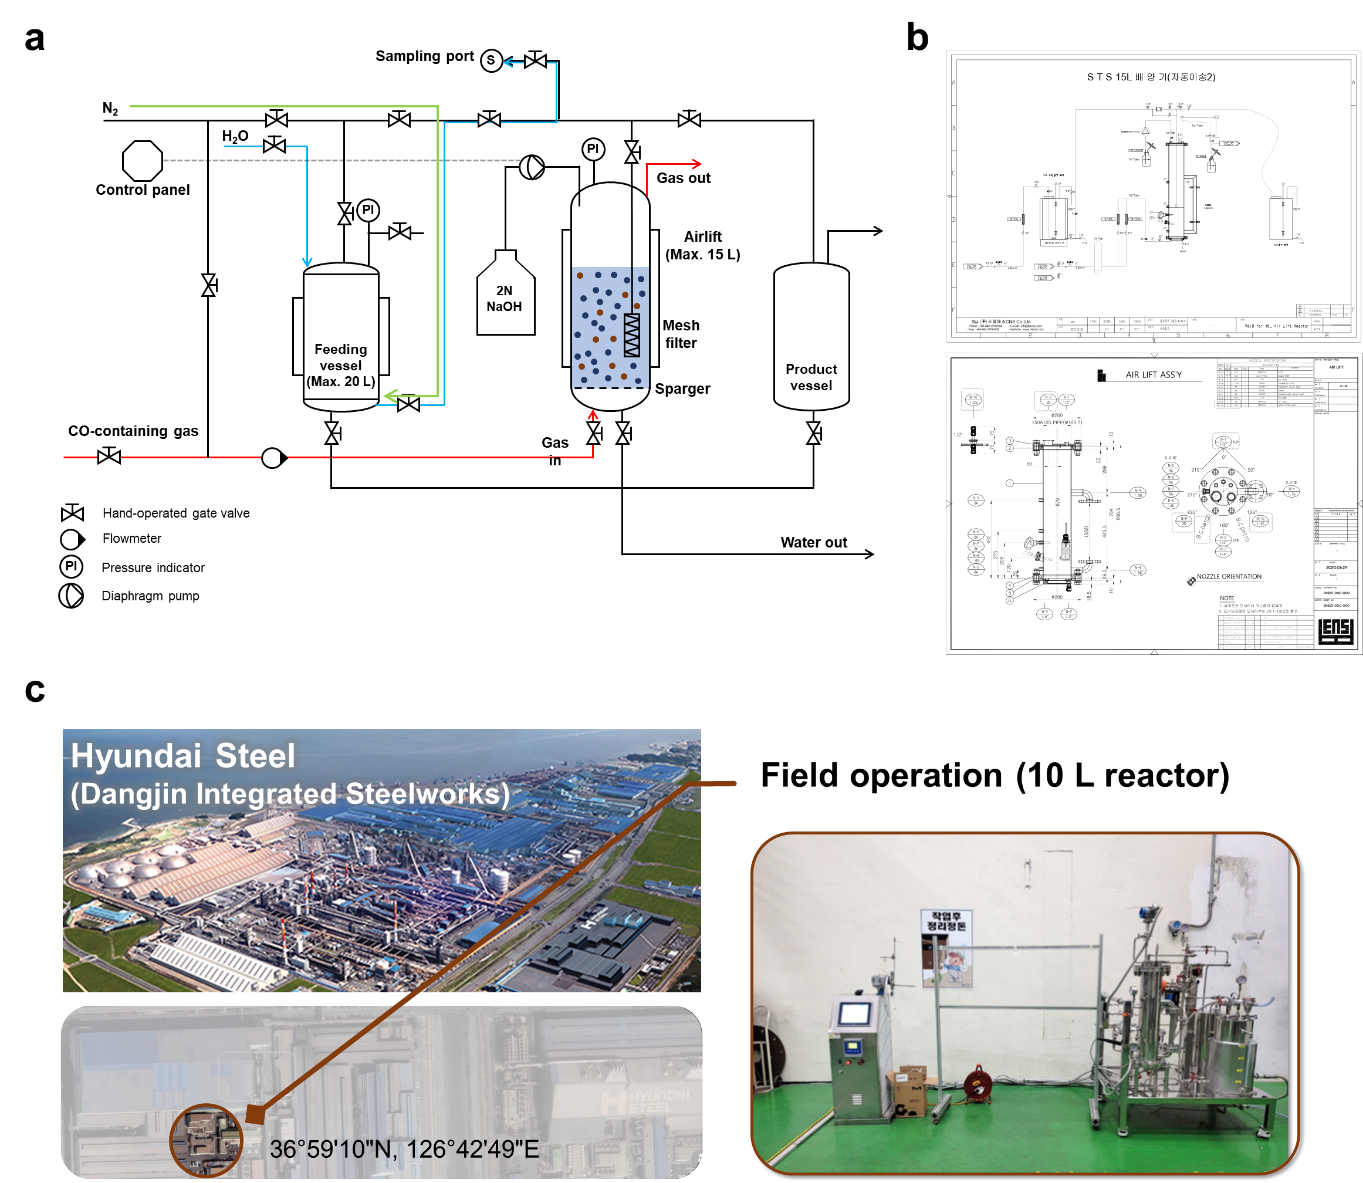
**

**Supplementary Figure 13 | Field operation of 10 L enCOH reactor. a**, Process flow diagram. **b**, Piping and instrumentation diagram. **c**, Reactor site and installation view.


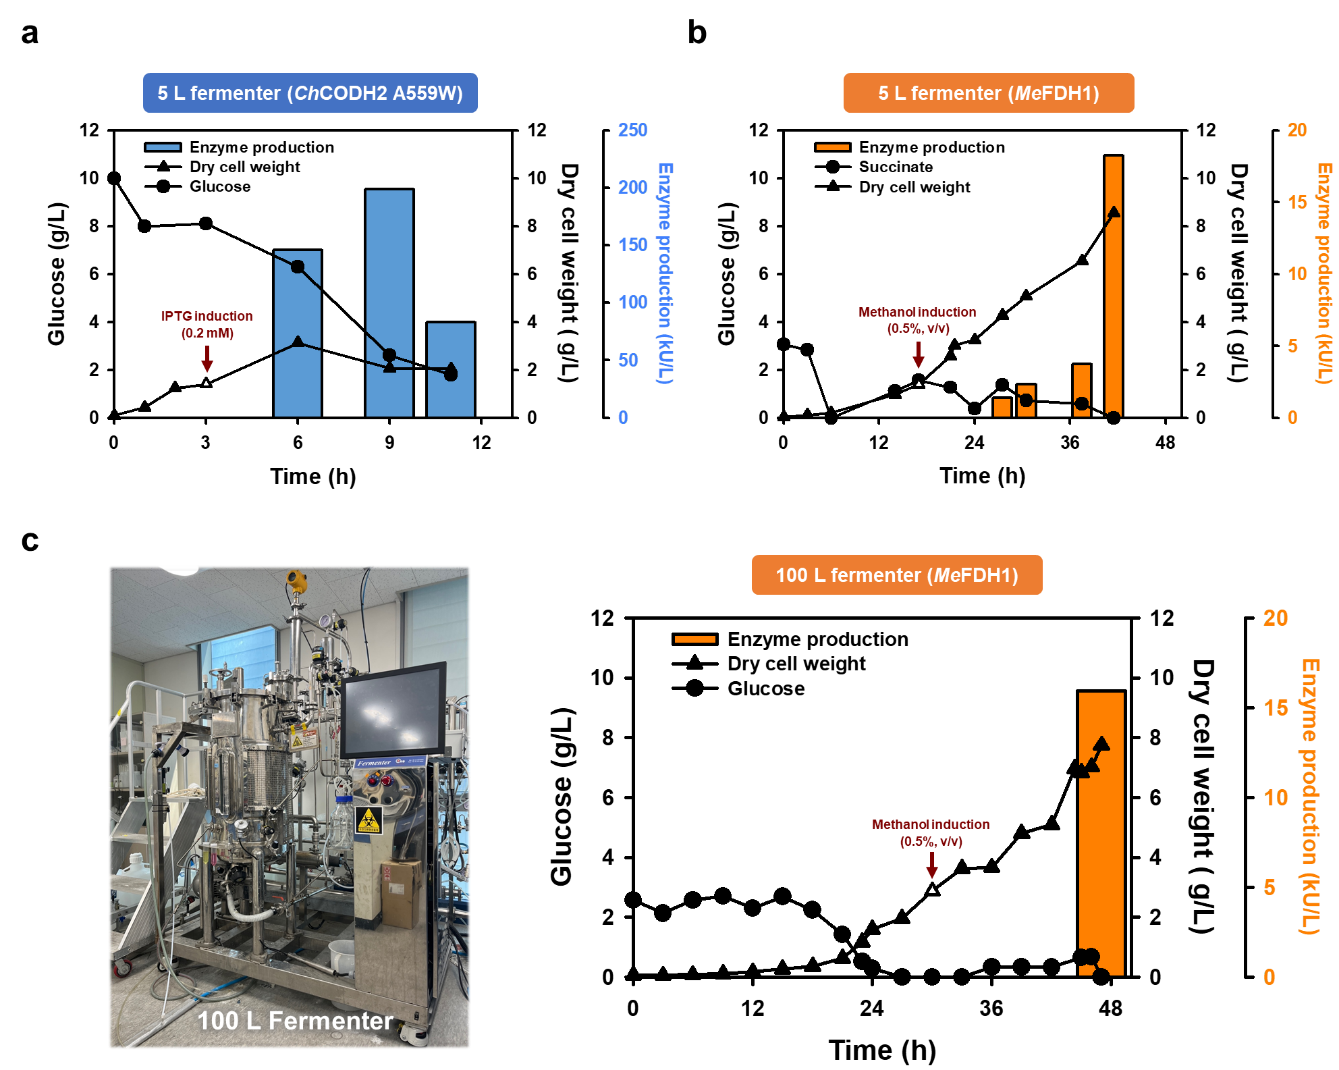


**Supplementary Figure 14 | Large-scale production of enCOH enzymes via fermentation. a**, Expression of *Ch*CODH2 A559W enzyme in a 5 L fermenter. **b**, Expression of *Me*FDH1 enzyme in a 5 L fermenter. **c**, 100 L fermenter and large-scale expression of *Me*FDH1 enzyme. The expression of enCOH enzymes utilized 5 L and 100 L fermenters. Given the relatively low activity of *Me*FDH1 compared to *Ch*CODH2 A559W, large-scale enzyme production was necessary for operating a 10 L enzyme reactor at Hyundai Steel, prompting not only 5 L but also 100 L fermentation production. During *Me*FDH1 fermentation production, the carbon source succinate was added to increase protein yield.
